1 **Clustered, information-dense transcription factor binding sites identify genes with**  
2 **similar tissue-wide expression profiles**

3 **Ruipeng Lu<sup>1</sup>, Peter K. Rogan<sup>1,2,3\*</sup>**

4 <sup>1</sup> Department of Computer Science, Western University, London, Canada, N6A 5B7

5 <sup>2</sup> Department of Biochemistry, Western University, London, Canada, N6A 5C1

6 <sup>3</sup> Cytognomix Inc., London, Canada, N5X 3X5

7 \* Correspondence: Dr. Peter K. Rogan ([progan@uwo.ca](mailto:progan@uwo.ca)), 1 (519) 661-4255

8

9 Running title: Binding site clusters identify transcription targets

10

11

12

13

14

15

16

17

18

19

20

21 **ABSTRACT**

22 **Background:** The distribution and composition of *cis*-regulatory modules (e.g. transcription  
23 factor binding site (TFBS) clusters) in promoters substantially determine gene expression  
24 patterns and TF targets, whose expression levels are significantly regulated by TF binding. TF  
25 knockdown experiments have revealed correlations between TF binding profiles and gene  
26 expression levels. We present a general framework capable of predicting genes with similar  
27 tissue-wide expression patterns from activated or repressed TF targets using machine learning  
28 to combine TF binding and epigenetic features.

29 **Methods:** Genes with correlated expression patterns across 53 tissues were identified  
30 according to their Bray-Curtis similarity. DNase I HyperSensitive region (DHS) -accessible  
31 promoter intervals of direct TF target genes were scanned with previously derived information  
32 theory-based position weight matrices (iPWMs) of 82 TFs. Features from information density-  
33 based TFBS clusters were used to predict target genes with machine learning classifiers. The  
34 accuracy, specificity and sensitivity of the classifiers were determined for different feature sets.  
35 Mutations in TFBSs were also introduced to examine their impact on cluster densities and the  
36 regulatory states of predicted target genes.

37 **Results:** We initially chose the glucocorticoid receptor gene (*NR3C1*), whose regulation has  
38 been extensively studied, to test this approach. *SLC25A32* and *TANK* were found to exhibit the  
39 most similar expression patterns to this gene across 53 tissues. Prediction of other genes with  
40 similar expression profiles was significantly improved by eliminating inaccessible promoter  
41 intervals based on DHSs. A Random Forest classifier exhibited the best performance in  
42 detecting such coordinately regulated genes (accuracy was 0.972 for training, 0.976 for testing).  
43 Target gene prediction was confirmed using CRISPR knockdown data of TFs, which was more  
44 accurate than siRNA inactivation. Mutation analyses of TFBSs also revealed that one or more  
45 information-dense TFBS clusters in promoters are required for accurate target gene prediction.

46 **Conclusions:** Machine learning based on TFBS information density, organization, and  
47 chromatin accessibility accurately identifies gene targets with comparable tissue-wide  
48 expression patterns. Multiple, information-dense TFBS clusters in promoters appear to protect  
49 promoters from the effects of deleterious binding site mutations in a single TFBS that would  
50 effectively alter the expression state of these genes.

## 51 **KEYWORDS**

52 Information theory, transcription factors, DNA binding sites, gene expression, mutation analysis,  
53 machine learning

## 54 **BACKGROUND**

55 The distinctive organization and combination of transcription factor binding sites (TFBSs) and  
56 regulatory modules in promoters dictates specific expression patterns within a set of genes [1].  
57 Clustering of multiple adjacent binding sites for the same TF (homotypic clusters) and for  
58 different TFs (heterotypic clusters) defines *cis*-regulatory modules (CRMs) in human gene  
59 promoters and can amplify the influence of individual TFBSs on gene expression through  
60 increasing binding affinities, facilitated diffusion mechanisms and funnel effects [2]. Because  
61 tissue-specific TF-TF interactions in TFBS clusters are prevalent, these features can assist in  
62 identifying correct target genes by altering binding specificities of individual TFs [3]. Previously,  
63 we derived iPWMs from ChIP-seq data that can accurately detect TFBSs and quantify their  
64 strengths by computing associated  $R_i$  values (Rate of Shannon information transmission for an  
65 individual sequence [4]), with  $R_{sequence}$  being the average of  $R_i$  values of all binding site  
66 sequences and representing the average binding strength of the TF [3]. Furthermore,  
67 information density-based clustering (IDBC) can effectively identify functional TF clusters by  
68 taking into account both the spatial organization (i.e. intersite distances) and information density  
69 (i.e.  $R_i$  values) of TFBSs [5].

70 TF binding profiles, either derived from in vivo ChIP-seq peaks [6–8] or computationally  
71 detected binding sites and CRMs [9], have been shown to be predictive of absolute gene  
72 expression levels using a variety of tissue-specific machine learning classifiers and regression  
73 models. Because signal strengths of ChIP-seq peaks are not strictly proportional to TFBS  
74 strengths [3], representing TF binding strengths by ChIP-seq signals may not be appropriate;  
75 nevertheless, both achieved similar accuracy [10]. CRMs have been formed by combining two  
76 or three adjacent TFBSs [9], which is inflexible, as it arbitrarily limits the number of binding sites  
77 contained in a module, and does not consider differences between information densities of  
78 different CRMs. Chromatin structure (e.g. histone modification (HM) and DNase I  
79 hypersensitivity) were also found to be highly redundant with TF binding in explaining tissue-  
80 specific mRNA transcript abundance at a genome-wide level [7,8,11,12], which was attributed to  
81 the heterogeneous distribution of HMs across chromatin domains [8]. Combining these two  
82 types of data explained the largest fraction of variance in gene expression levels in multiple cell  
83 lines [7,8], suggesting that either contributes unique information to gene expression that cannot  
84 be compensated for by the other.

85 The number of genes directly bound by a TF significantly exceeds the number of genes  
86 whose expression levels significantly change upon knockdown of the TF. Only a small subset of  
87 genes whose promoters overlap ChIP-seq peaks were differentially expressed (DE) after  
88 individually knocking 59 TFs down using small interfering RNAs (siRNAs) in the GM19238 cell  
89 line [13]. Correlation between TFBS counts and gene expression levels across 10 different cell  
90 lines among 8,872 genes from these knockdown data were more predictive of DE targets than  
91 setting a minimum threshold on TFBS counts [14]. Their TFBS counts were defined as the  
92 number of ChIP-seq peaks overlapping the promoter, though it was unknown how many binding  
93 sites were present in these peaks; true positives might not be direct targets in the TF regulatory  
94 cascade, as the promoters of these targets were not intersected with ChIP-seq peaks. By

95 perturbing gene expression with CAS9-directed clustered regularly interspaced short  
96 palindromic repeats (CRISPR) of 10 different TF genes in K562 cells, the regulatory effects of  
97 each TF on 22,046 genes were dissected by single cell RNA sequencing with a regularized  
98 linear computational model [15]; this accurately revealed DE targets and new functions of  
99 individual TFs, some of which were likely regulated through direct interactions at TFBS in their  
100 corresponding promoters. Machine learning classifiers have also been applied in a small  
101 number of gene instances to predict targets of a single TF using features extracted from  $n$ -  
102 grams derived from consensus binding sequences [16], or from TFBSs and homotypic binding  
103 site clusters [5].

104 To investigate whether the distribution and composition of information theory-based CRMs in  
105 promoters substantially determines gene expression profiles of direct TF targets, we developed  
106 a general machine learning framework that predicts which genes have similar expression  
107 profiles to a given gene and DE direct TF targets by combining information theory-based TF  
108 binding profiles with DHSs. Upon filtering for accessible promoter intervals with DHSs, features  
109 designed to capture the spatial distribution and information composition of CRMs were extracted  
110 from clusters identified by the IDBC algorithm from iPWM-detected TFBSs. Though not all direct  
111 targets regulated by multiple TFs share a common tissue-wide expression profile, this  
112 framework provides insight into the transcriptional program of genes with similar profiles by  
113 dissecting their *cis*-regulatory element organization and strengths. We identify genes with  
114 comparable tissue-wide expression profiles by application of Bray-Curtis similarity [17]. Using  
115 transcriptome data generated by CRISPR [15] and siRNA-based [13] TF knockdowns, we  
116 verified predicted direct TF targets whose promoters overlap tissue-specific ChIP-seq peaks, in  
117 contrast with correlation-based approaches [14].

## 118 **METHODS**

119 To identify genes with similar tissue-wide expression patterns, we formally define gene  
120 expression profiles and pairwise similarity measures between profiles of different genes. A  
121 general machine learning framework relates features extracted from the organization of TFBSs  
122 in these genes to their tissue-wide expression patterns. True positives (TPs) and negatives  
123 (TNs) for predicting direct DE TF targets were validated using CRISPR- and siRNA-generated  
124 knockdown data (see below).

### 125 **Similarity between gene expression profiles**

126 The median RPKM (Reads Per Kilobase of transcript per Million mapped reads) of 56,238  
127 genes across 53 tissues were obtained from the Genotype-Tissue Expression (GTEx) project  
128 [18]. To capture the tissue-wide overall expression pattern of a gene instead of within a single  
129 tissue, the expression profile of a gene was defined as its median RPKM across the 53 tissues,  
130 which forms a vector of size 53 and does not distinguish between different isoforms whose  
131 expression patterns may significantly differ from each other. To obtain ground-truth genes that  
132 have similar expression profiles to a given gene, the Bray-Curtis Similarity (Equation 1) was  
133 used to compute the similarity value between the expression profiles of two genes, because it  
134 takes both the directions and lengths of the vectors into account while maintaining strict bounds  
135 of 0 and 1.

$$136 \quad sim_{Bray-Curtis}(EP^A, EP^B) = \begin{cases} 1, & \text{if } \sum_{i=1}^{53} EP_i^A = \sum_{i=1}^{53} EP_i^B = 0 \\ 1 - \frac{\sum_{i=1}^{53} |EP_i^A - EP_i^B|}{\sum_{i=1}^{53} (EP_i^A + EP_i^B)}, & \text{otherwise} \end{cases} \quad (1)$$

137 where  $EP^A$  and  $EP^B$  are respectively the expression profiles of genes  $A$  and  $B$ ,  $EP_i^A$  and  $EP_i^B$  are  
138 respectively the median RPKM of genes  $A$  and  $B$  in the  $i$ th tissue. If  $EP^A = EP^B$ , then  
139  $sim_{Bray-Curtis}(EP^A, EP^B) = 1$ .

### 140 **Prediction of genes with similar expression profiles**

141 The framework for identifying genes that have similar expression profiles to a specific gene is  
142 shown in Figure 1A and 1B. All DHSs in 95 cell types generated by the ENCODE project [18;  
143 hg38 assembly] were intersected with known promoters [20], then 94 iPWMs exhibiting primary  
144 binding motifs for 82 TFs [3] were used to detect TFBSs in overlapping intervals. When  
145 detecting heterotypic TFBS clusters with the IDBC algorithm, a minimum threshold  $0.1 * R_{sequence}$   
146  $R_{sequence}$  was set for  $R_i$  values of TFBSs, in order to remove weak binding sites that were likely  
147 to be false positive TFBSs.

148 The information density-related features derived from each TFBS cluster include: 1) The  
149 distance between this cluster and the transcription start site (TSS); 2) The length of this cluster;  
150 3) The information content of this cluster (i.e. the sum of  $R_i$  values of all TFBSs in this cluster); 4)  
151 The number of binding sites of each TF within this cluster; 5) The number of strong binding sites  
152 ( $R_i > R_{sequence}$ ) of each TF within this cluster; 6) The sum of  $R_i$  values of binding sites of each TF  
153 within this cluster; 7) The sum of  $R_i$  values of strong binding sites ( $R_i > R_{sequence}$ ) of each TF  
154 within this cluster.

155 For a gene instance, each of Features 1-3 is defined as a vector whose size equals the  
156 number of clusters in the promoter; thus, the entire vector could be input into a classifier. If two  
157 instances contained different numbers of clusters, the maximum number of clusters among all  
158 instances was determined, and null clusters are added at the 5' end of promoters with fewer  
159 clusters, enabling all instances to have the same cluster count. Machine learning classifiers in  
160 Weka [21] were implemented for training and testing.

## 161 **Prediction of differentially expressed direct targets of TFs**

### 162 *Using gene expression in the CRISPR-based perturbations*

163 Dixit et al. performed CRISPR-based perturbation experiments using multiple guide RNAs for  
164 each of ten TFs in K562 cells, resulting in a regulatory matrix of coefficients that indicate the

165 effect of each guide RNA on each of 22,046 genes [15]. The coefficient of a guide RNA on a TF  
166 gene target is defined as the  $\log_{10}$ (fold change in gene expression level) [15]. Among these ten  
167 TFs, we have previously derived iPWMs exhibiting primary binding motifs for seven (EGR1,  
168 ELF1, ELK1, ETS1, GABPA, IRF1, YY1) [3]. Therefore, the framework for predicting direct TF  
169 targets in the K562 cell line (Figure 1A and 1C) was applied to these TFs. The criteria for  
170 defining a TP (i.e. a DE direct target), of a TF was:

- 171 1) The fold change in the expression level of this gene for each guide RNA of the TF was  $>$   
172 (or  $<$ ) 1, consistent with the possibility that the gene was regulated by the TF, and
- 173 2) The average fold change in the expression level of this gene for all guide RNAs of the TF  
174 was  $>$  threshold  $\varepsilon$  (or  $< 1/\varepsilon$ ), and
- 175 3) The promoter interval (10 kb) upstream of a TSS of this gene overlaps a ChIP-seq peak of  
176 the TF in the K562 cell line.

177 If the coefficients of all guide RNAs of the TF for a gene are zero, the gene was defined as a  
178 TN. As the threshold  $\varepsilon$  increases, the number of TPs strictly decreases; as  $\varepsilon$  decreases, we  
179 have increasingly lower confidence in the fact that the TPs were indeed differentially expressed  
180 because of the TF perturbation. To achieve a balance between sensitivity and specificity, we  
181 evaluated three different values (i.e. 1.01, 1.05 and 1.1) for  $\varepsilon$ . For each TF, all ENCODE ChIP-  
182 seq peak datasets from the K562 cell line were merged to determine TPs. To make the  
183 numbers of TNs and TPs equal, the Bray-Curtis function was applied to compute the similarity  
184 values in the expression profile between all TNs and the TP with the largest average coefficient,  
185 then the TNs with the smallest values were selected (Figure 1C).

186 Because TFs act upon different sets of target genes in different tissues [3], the iPWMs of  
187 EGR1, ELK1, ELF1, GABPA, IRF1, YY1 from the K562 cell line were used to detect binding  
188 sites; for ETS1, we used the only available iPWM from the GM12878 cell line [3]. Six features



189 were derived from each homotypic cluster (i.e. Features 3 and 6 converged to the same value,  
190 because only binding sites from a single TF were used).

### 191 *Using gene expression in the siRNA-based knockdown*

192 In the GM19238 cell line, 59 TFs were individually knocked down using siRNAs, and  
193 significant changes in the expression levels of 8,872 genes were indicated according to their  
194 corresponding P-values [13]. In these cases, the P-value of a gene for a TF is the probability of  
195 observing the change in the expression level of this gene under the null hypothesis of no  
196 differential expression after TF knockdown; thus the larger the change in the expression level,  
197 the smaller the P-value and the more likely this gene is differentially expressed. They also  
198 indicated whether the promoters of these genes display evidence of binding to TFs by  
199 intersecting with ChIP-seq peaks in the GM12838 cell line. Among these 59 TFs, we have  
200 previously derived accurate iPWMs exhibiting primary binding motifs for 11 (BATF, JUND,  
201 NFE2L1, PAX5, POU2F2, RELA, RXRA, SP1, TCF12, USF1, YY1) [3]. Therefore, the  
202 framework for predicting direct TF targets in the GM19238 cell line (Figure 1A and 1D) was  
203 applied to these 11 TFs.

204 We defined a TP (i.e. a DE direct target) for a TF, if the P-value of this gene for the TF was  $\leq$   
205 0.01, and the promoter interval (10kb) upstream of a TSS of this gene overlapped a ChIP-seq  
206 peak of the TF in the GM12878 cell line. A TN for a TF exhibited the following properties: a P-  
207 value  $> 0.01$  for the TF, and this gene was annotated to exhibit a single promoter and one  
208 constitutive transcript. Because different transcripts can display different tissue-specific  
209 expression [22], the use of genes with one single transcript guaranteed that the analyzed  
210 promoters functionally induce their expression in the GM12878 cell line. TPs and TNs were  
211 ranked according to their Bray-Curtis similarity values prior to being separated into training and  
212 test sets (Figure 1D).

213 The DHSs in the GM19238 cell line mapped from the hg19 genome assembly were first  
214 remapped to the hg38 assembly using liftOver (available at genome.ucsc.edu) [23]. Aside from  
215 RELA and NFE2L1, the iPWMs of TFs from the GM12878 cell line were used to detect binding  
216 sites. For RELA, the iPWM from the GM19099 cell line was used; for NFE2L1, the only  
217 available iPWM was derived from K562 cells and was applied. Although the knockdown was  
218 performed in GM19238, GM12878 and GM19099 are also lymphoblastic cell lines, with  
219 GM19099 and GM19238 both being derived from Yorubans. For this analysis, the iPWMs  
220 derived in GM12878 and GM19099 were more appropriate than the iPWM from K562, since  
221 GM12878 and GM19099 are of the same tissue type and are thus more likely comparable to  
222 GM19238 than to K562.

### 223 **Mutation analyses on promoters of differentially expressed direct targets**

224 To better understand the significance of individual binding sites for information-dense  
225 clusters and the regulatory state of direct targets, we evaluated the effects of sequence changes  
226 that altered the  $R_i$  values of these sites on cluster formation and whether a gene was predicted  
227 to be a TF target. Mutations were sequentially introduced into the strongest binding sites in  
228 TFBS clusters of the EGR1 target gene, *MCM7*, to determine the threshold for cluster formation  
229 after disappearing clusters disabled induction of *MCM7* expression. For one target gene of each  
230 TF from the CRISPR-generated perturbation data, effects of naturally occurring TFBS variants  
231 present in dbSNP (<https://www.ncbi.nlm.nih.gov/projects/SNP/>) [24] were also evaluated to  
232 explore aspects of TFBS organization that enabled both clusters and promoter activity to be  
233 resilient to binding site mutations. This was done by analyzing whether the occurrence of  
234 individual or multiple single nucleotide polymorphisms (SNPs) lead to the loss of binding sites  
235 and the clusters that contain them, and result in changes in the predictions of these targets.

## 236 **RESULTS**

## 237 **Similarity between gene expression profiles**

238 To confirm that the Bray-Curtis Similarity can indeed effectively measure how akin the  
239 expression profiles of two genes are to each other, it was applied to compute the similarity  
240 values between the expression profiles of the glucocorticoid receptor (*GR* or *NR3C1*) gene and  
241 all other 56,237 genes. *NR3C1* is an extensively characterized TF with many known direct  
242 target genes [22]. As a constitutively expressed TF activated by glucocorticoid ligands, it can  
243 mediate the up-regulation of anti-inflammatory genes by binding of homodimers to  
244 glucocorticoid response elements and down-regulation of proinflammatory genes by complexing  
245 with other activating TFs (e.g. NF $\kappa$ B and AP1) and eliminating their ability to bind targets [22].  
246 *NR3C1* can bind its own promoter forming an auto-regulatory loop, which also contains  
247 functional binding sites of 11 other TFs (e.g. SP1, YY1, IRF1, NF $\kappa$ B) whose iPWMs have been  
248 developed and/or mutual interactions have been described in Lu et al. [3,22]. However, the  
249 expression profile of *NR3C1* integrates all different splicing and translational isoforms (e.g.  
250 *GR $\alpha$ -A* to *GR $\alpha$ -D*, *GR $\beta$* , *GR $\gamma$* , *GR $\delta$* ), whereas these isoforms have tissue-specific expression  
251 patterns (e.g. levels of the *GR $\alpha$ -C* isoforms are significantly higher in the pancreas and colon,  
252 whereas levels of *GR $\alpha$ -D* are highest in spleen and lungs) [22]. *SLC25A32* and *TANK* have the  
253 greatest similarity values to *NR3C1* (0.880 and 0.877 respectively), which is evident intuitively  
254 based on their overall similar expression patterns across the 53 tissues (Figure 2).

## 255 **Prediction of genes with similar expression profiles**

256 The framework for predicting genes with similar expression profiles was based on promoter  
257 scans with each TFBS, followed by the derivation of the spatial density- and information density-  
258 related features from clusters in each promoter for genes with an *NR3C1*-like expression pattern  
259 (as shown in Figure 1A and 1B). We investigated two versions of this framework, depending on  
260 whether promoter sequences were first intersected with DHSs. Under both scenarios, all  
261 classifiers (Naïve Bayes, two types of Decision trees and three types of Support vector

262 machines (SVM)) were applied to both the training and test sets, successfully distinguishing  
263 similar from dissimilar genes in terms of expression profiles (i.e. accuracy, sensitivity and  
264 specificity all > 0.5) (Table 1, Additional file 5). We found, however, that generally all TFBSs in a  
265 DHS formed a binding site cluster, and the performance of all classifiers were significantly  
266 improved by inclusion of DHS information (i.e. accuracy, sensitivity and specificity were all  
267 increased) (Table 1, Additional file 5). The SVM classifier with the RBF kernel and the Random  
268 Forest classifier were the only two classifiers with accuracies exceeding 0.97, and each  
269 performed equally well on both the training and test sets (Table 1).

### 270 **Prediction of differentially expressed direct TF targets**

271 Between the two classifiers with the best performance in distinguishing genes with similar  
272 expression profiles to *NR3C1* from others (i.e. SVM with RBF kernel and Random Forest), we  
273 used a Random Forest (RF) classifier to predict direct TF targets respectively based on the  
274 CRISPR- [15] and siRNA-generated [13] perturbation data, because the SVM classifier with the  
275 RBF kernel did not perform as well (Additional file 5).

276 After eliminating TFBSs in inaccessible promoter intervals, i.e. those excluded from tissue-  
277 specific DHSs, the RF classifier predicted direct targets with greater accuracy and specificity  
278 (Table 2 and 3, Additional file 5). Specifically, predictions based on CRISPR-generated  
279 knockdown data for TFs: EGR1, ELK1, ELF1, ETS1, GABPA, and IRF1 were more accurate  
280 than for YY1, which itself represses or activates a wide range of promoters by binding to sites  
281 overlapping the TSS (Table 2, Additional file 5). Accordingly, the perturbation data indicated that  
282 YY1 has ~3-23 times more targets in the K562 cell line than the other TFs ( $\epsilon = 1.05$ ), and its  
283 binding has a more significant impact on the expression levels of target genes (for YY1, the ratio  
284 of the target counts at  $\epsilon = 1.1$  vs  $\epsilon = 1.01$  was 0.328, which significantly exceeded those of the  
285 other TFs (0.019-0.081); Additional file 3). This is concordant with our previous finding that YY1  
286 extensively interacts with 11 cofactors (e.g. DNA-binding IRF9 and TEAD2; non-DNA-binding

287 DDX20 and PYGO2) in K562 cells, consistent with a central role in specifying erythroid-specific  
288 lineage development [3].

289 Despite a high accuracy of target recognition, sensitivity was consistently higher than  
290 specificity (Table 2, Additional file 5), implying that the classifier more effectively identified direct  
291 targets compared to non-targets. This is attributable to the fact that the promoters of false  
292 positive target genes also contain accessible, but non-functional TFBSs. In vivo co-regulation  
293 mediated by interacting cofactors, which was excluded by the classifier, assisted in  
294 distinguishing these non-functional sites that do not significantly affect gene expression [3,13].

295 As the threshold  $\varepsilon$  increased, the accuracy of the classifier monotonically increased on the  
296 training sets of all the TFs (Figure 3) as expected. For a gene to be defined as a DE target of a  
297 TF, the average fold change in its expression level for all guide RNAs that downregulated the  
298 TF were required to reach the minimum threshold  $\varepsilon$ . Upon TF knockdown, higher  $\varepsilon$  is inversely  
299 correlated with the number of target genes, but positively correlated with larger fold changes in  
300 their corresponding expression levels. In general, more significantly DE genes have been  
301 associated with a higher number of TFBSs in their promoters [13]. Thus, at greater  $\varepsilon$ , there are  
302 larger differences in the values of machine learning features derived from TFBS clusters  
303 between direct targets and non-targets (Additional File 1). Note that this inference holds valid  
304 only when taking all direct targets and non-targets of a TF into account; it may not be true for a  
305 specific pair of genes (i.e. the promoter of a gene that is not a DE target may contain a greater  
306 number of accessible, but non-functional TFBSs) (Additional File 1). We noted this trend on the  
307 test sets of only ELF1 and IRF1 (Figure 3); for the other five TFs (EGR1, ELK1, ETS1, GABPA,  
308 YY1), differences in the clustered TFBS counts between targets and non-targets did not  
309 necessary increase with larger values of  $\varepsilon$ , since the test set consists of both targets and non-  
310 targets in equal proportions (Additional File 1). However, the classifier performed well in each

311 instance, because the count differences were still sufficiently large to discriminate between  
312 targets and non-targets (Figure 3).

313 With the siRNA-generated knockdown data, the performance of the RF classifier was  
314 compared to an approach inferring DE targets by correlating TF binding with gene expression  
315 levels across ten cell types [14]. In this correlation-based approach, three measures (i.e. the  
316 absolute Pearson correlation coefficient (PC), the absolute Spearman correlation coefficient  
317 (SC), and the absolute combined angle ratio statistic (CARS)), whose performance was  
318 evaluated with precision-recall curves, were alternatively used to compute a correlation score  
319 between the number of ChIP-seq peaks overlapping the promoter and gene expression values.  
320 Genes predicted to be DE targets had scores above the threshold resulting in a 1.5-fold  
321 increase compared to the background precision. For example, in the case of the TF YY1, which  
322 was analyzed by both approaches, the performance of the RF classifier on the training set was  
323 0.66 (precision) and 0.456 (recall), and the test set was 0.672 and 0.396 (Table 3). This  
324 classifier outperformed all three correlation measures (PC: 0.467 and 0.003; SC: 0.467 and  
325 0.006; CARS: 0.467 and 0.003), even though the correlation approach used a less stringent P-  
326 value threshold (0.05) for defining differential expression of likely non-direct targets, and  
327 intersected ChIP-seq peaks over shorter 5kb promoter intervals upstream of the TSS.

### 328 **Intersection of genes with similar expression profiles and direct targets**

329 To determine how many direct targets have similar tissue-wide expression profiles, we  
330 intersected the set of targets with the set of 500 genes with the most similar expression profiles  
331 for each TF (Table 4, Additional file 6). The TFs PAX5 and POU2F2 are primarily expressed in  
332 B cells, and their respective targets *IL21R* and *CD86* are also B cell-specific, which accounts for  
333 the high similarity in the expression profile between them. There are respectively 21 and 7  
334 nuclear mitochondrial genes (e.g. *MRPL9* and *MRPS10*, which are subunits of mitochondrial  
335 ribosomes) in the intersections for YY1 in the K562 and GM19238 cell lines [25]. Previous

336 studies reported that YY1 upregulates a large number of mitochondrial genes by complexing  
337 with PGC-1 $\alpha$  in C2C12 cells [26], and genes involved in the mitochondrial respiratory chain in  
338 K562 cells [15], which is consistent with the idea that YY1 may broadly regulate mitochondrial  
339 function (within all 53 tissues in addition to the erythrocyte, lymphocyte and skeletal muscle cell  
340 lines).

341 Between 0.4%-25% of genes with similar expression profiles to the TFs are actually direct  
342 targets (Table 4); the majority are non-targets whose promoters contain non-functional binding  
343 sites that are distinguished from targets by their lack of coregulation by corresponding cofactors.  
344 For YY1 and EGR1, we validated this hypothesis by contrasting the flanking cofactor binding  
345 site distributions and strengths in the promoters of the most similarly expressed target genes  
346 (YY1: *MRPL9*, *BAZ1B*; EGR1: *CANX*, *NPM1*) and non-target genes (YY1: *ADNP*, *RNF25*;  
347 EGR1: *AC142293.3*, *AP000705.7*). Strong and intermediate recognition sites for TFs: SP1,  
348 KLF1, CEBPB formed heterotypic clusters with adjacent YY1 sites; as well TFBSs of SP1, KLF1,  
349 and NFY were frequently present adjacent to EGR1 binding sites. These patterns contrasted  
350 with the enrichment of CTCF and ETS binding sites in gene promoters of YY1 and EGR1 non-  
351 targets (Additional file 7). Previous studies have reported that KLF1 is essential for terminal  
352 erythroid differentiation and maturation [27], direct physical interactions between YY1 and the  
353 constitutive activator SP1 synergistically induce transcription [28], the activating CEBPB  
354 promotes differentiation and suppresses proliferation of K562 cells by binding the promoter of  
355 the G-CSFR gene encoding a hematopoietin receptor [29], EGR1 and SP1 synergistically  
356 cooperate at adjacent non-overlapping sites on EGR1 promoter but compete binding at  
357 overlapping sites [30]; whereas CTCF functions as an insulator blocking the effects of *cis*-acting  
358 elements and preventing gene activation [31], and ETV6, a member of the ETS family, is a  
359 transcriptional repressor required for bone marrow hematopoiesis and associated with leukemia  
360 development [32].

## 361 **Mutation analyses on promoters of direct targets**

362 Because the promoters of most direct targets contain multiple binding site clusters, we  
363 anticipate that this enables these genes' expression to be naturally robust against binding site  
364 mutations; in other words, the other clusters can compensate for the loss of a cluster destroyed  
365 by mutations in binding sites, so that the mutated promoters are still capable of effectively  
366 inducing gene transcription upon TF binding. First, we validated this hypothesis by examining  
367 whether introducing artificial variants into binding sites in the promoter of the target gene *MCM7*  
368 in the test set of EGR1 changes the classifier output (Figure 4). Specifically, in the K562 cell line,  
369 *MCM7* is upregulated by EGR1. Knockdown of *MCM7* has an anti-proliferative and pro-  
370 apoptotic effect on K562 cells [33] and the loss of EGR1 increases leukemia initiating cells [34],  
371 which suggests that EGR1 may act as a tumor suppressor in K562 cells through the *MCM7*  
372 pathway.

373 First, the strongest binding site (at position chr7:100103347 [hg38], - strand,  $R_i = 12.0$  bits) in  
374 the promoter was eliminated by a G->A mutation, resulting in the disappearance of Cluster 1,  
375 which consists of two sites (the other site at chr7:100103339, -, 4.3 bits). EGR1 was still  
376 predicted to compensate for this mutation, due to the presence of the other two clusters  
377 comprising weaker binding sites of intermediate strength (chr7:100102252, +, 7.0 bits;  
378 chr7:100102244, +, 1.3 bits; chr7:100101980, +, 8.9 bits; chr7:100101977, +, 2.2 bits;  
379 chr7:100101984, +, 1.9 bits), enabling the promoter to maintain capability of inducing *MCM7*  
380 expression (Figure 4). These adjacent clustered sites, which may not be strong enough to bind  
381 TFs and individually activate transcription, can stabilize each other's binding [2]. The weaker  
382 sites flanking a strong binding site in a cluster can direct the TF molecule to the strong site and  
383 extend the period of the molecule physically associating with the strong site, which is termed,  
384 the funnel effect [2]. Further, Clusters 2 and Cluster 3 were respectively removed by G->T and  
385 C->G mutations abolishing the strongest site in either cluster, which altered the prediction, that



386 is, EGR1 lost the capability to induce *MCM7* transcription (Figure 4). The remaining four sparse  
387 weak sites do not form a cluster and cannot completely supplant the disrupted strong sites.

388 Further, we examined the impacts of known natural SNPs on binding site strengths, clusters  
389 and the regulatory state of the promoter for a direct target of each of the seven TFs from the  
390 CRISPR-generated perturbation data (Table 5). Often a single SNP (e.g. rs996639427 of EGR1)  
391 can affect the strengths of multiple binding sites (Table 5). Apart from SNPs that are predicted  
392 to abolish binding (Figure 4), leaky variants that merely weaken TF binding are common (Table  
393 5). Binding stabilization between adjacent sites and the funnel effect enable the CRMs  
394 comprised of information-dense clusters to be robust to mutations in individual binding sites. In  
395 this way, neither mutations that abolish TFBSs nor leaky SNPs in flanking weak sites can  
396 destroy functional clusters (e.g. rs1030185383 and rs5874306 of IRF1), whereas SNPs with  
397 large reductions in  $R_i$  values of central strong sites are more likely to abolish clusters (e.g.  
398 rs865922947, rs946037930, rs917218063 and rs928017336 of YY1) (Table 5). More generally,  
399 the presence of multiple clusters enables promoters to be effectively resilient to the effects  
400 binding site mutations; only the complete abolishment of all clusters resulting from the  
401 simultaneous occurrence of multiple SNPs can transform the promoter to be unresponsive to TF  
402 binding to residual weak sites (e.g. rs997328042, rs1020720126 and rs185306857 of GABPA)  
403 (Table 5). Furthermore, a relatively small number of SNPs that strengthen TF binding and  
404 eventually amplify the regulatory effect of the TF on the gene expression level are also present  
405 (e.g. rs887888062 of EGR1 and rs751263172 of ELF1) (Table 5), suggesting that, in addition to  
406 deleterious mutations, benign variants may also be found in promoters, consistent with the  
407 expectations of neutral theory [35].

## 408 **DISCUSSION**

409 In this study, the Bray-Curtis Similarity function was initially shown (for the *NR3C1* gene) to  
410 measure the relatedness of overall expression patterns between genes across a diverse set of

411 tissues. The resulting machine learning framework distinguished similar from dissimilar genes  
412 based on the distribution, strengths and compositions of TFBS clusters in accessible promoters,  
413 which can substantially account for the corresponding gene expression patterns. Using  
414 knockdown data as the gold standard, the combinatorial use of TF binding profiles and  
415 chromatin accessibility was also demonstrated to be predictive of DE direct TF targets. A  
416 binding site comparison confirmed that coregulatory cofactors are responsible for distinguishing  
417 between functional sites in targets and non-functional ones in non-targets. Furthermore,  
418 mutation analyses on binding sites of targets demonstrated that the existence of both multiple  
419 TFBSs in a cluster and multiple information-dense clusters in a promoter enables both the  
420 cluster and the promoter to be resilient to binding site mutations.

421 The Random Forest classifier improved after intersecting promoters with DHSs in both  
422 prediction of genes with similar expression profiles to *NR3C1* and prediction of direct TF targets  
423 (Table 1, 2 and 3, Additional file 5). This intersection eliminated noisy binding sites that are  
424 inaccessible to TF proteins in promoters; specifically, it widened discrepancies in feature vectors  
425 between TPs and TNs. If the 10kb promoter of a gene instance does not overlap DHSs, its  
426 feature vector will only consist of 0; the percentages of TNs whose promoters do not overlap  
427 DHSs considerably exceeded those of TPs (Additional file 8), which led to an excess of TN  
428 feature vectors containing only 0 after intersection. This explains why these TNs are not  
429 functional targets of the TFs in the K562 and GM19238 cell lines, because their entire  
430 promoters are not open to TF molecules; other regulatory regions besides the proximal  
431 promoters (e.g. distal enhancers) still enable the TFs to effectively control the expression of the  
432 TPs with inaccessible promoters.

433 The relatively poor performance of the classifier on YY1 (Table 2) is attributable to its smaller  
434 percentage of TNs with inaccessible promoters (Additional file 8). Additionally, the Random  
435 Forest classifier was more predictive of functional TF binding on the CRISPR-generated

436 knockdown data than the siRNA-generated ones (Table 2 and 3). This larger discrepancy in  
437 feature vectors between TPs and TNs from CRISPR-based perturbations is also attributable to  
438 the greater differences in the percentages between TPs and TNs with inaccessible promoters  
439 (Additional file 8). Among the 22,046 genes whose expression levels were measured in the  
440 CRISPR-based perturbations, most of the TNs with inaccessible promoters merely have one  
441 transcript and specific functions (e.g. *VENTXP1* for the TF, EGR1), whereas many such TNs  
442 were excluded from the 8,872 genes whose knockdown data were generated by siRNA  
443 inactivation.

444 Our mutation analyses revealed that some deleterious TFBS mutations could be  
445 compensated for by other information-dense clusters in a promoter; thus predicting the effects  
446 of mutations in individual binding sites would not be sufficient to interpretation of downstream  
447 effects. Though compensatory clusters may maintain gene expression, the promoter will provide  
448 lower levels of activity than the wild-type promoter could, which is a recipe for achieving natural  
449 phenotypic diversity. Few published studies in molecular diagnostics have specifically examined  
450 the effects of naturally occurring variants within clustered TFBSs; thus IDBC-based machine  
451 learning provided an alternative computational approach to predict deleterious mutations that  
452 actually impact (i.e. repress or abolish) transcription of target genes and result in abnormal  
453 phenotypes, and to simultaneously minimize false positive calls of TFBS mutations that  
454 individually have little or no impact.

455 Apart from these TFs, the Bray-Curtis Similarity can be directly applied to identify the ground-  
456 truth genes with overall similar tissue-wide expression patterns to any other gene whose  
457 expression profile is known. Further studies could investigate the biological significance  
458 underlying the phenomenon that all these genes share a common expression pattern, including  
459 the similarity between other regulatory regions besides proximal promoters in terms of TFBSs  
460 and epigenetic markers. This machine learning framework can also be applied to predict direct

461 DE targets for other TFs and in other cell lines, depending on the availability of corresponding  
462 knockdown data.

463 There are a number of limitations of our approach. The Bray-Curtis function seems unable to  
464 accurately measure the similarity between gene expression profiles of a ubiquitously expressed  
465 gene (e.g. *NR3C1*) and a tissue-specific gene (e.g. stomach-specific *PGA3*), which exhibit quite  
466 different tissue-wide expression patterns (i.e.  $sim_{Bray-Curtis}(NR3C1, PGA3) = 0.007$ ). Intuitively,  
467 in terms of expression patterns *PGA3* is more similar to a gene (e.g. *MIR23A*) without any  
468 detectable mRNA in any of the 53 tissues analyzed than *NR3C1*; however, the Bray-Curtis  
469 similarity values indicate that both *PGA3* and *NR3C1* bear no similarity to *MIR23A* (i.e.  
470  $sim_{Bray-Curtis}(NR3C1, MIR23A) = sim_{Bray-Curtis}(PGA3, MIR23A) = 0$ ). Another possible  
471 limitation in classifier performance in the prediction of genes with similar tissue-wide expression  
472 profiles is that only binding sites of 82 TFs were analyzed due to a lack of available iPWMs for  
473 other TFs, given that 2000-3000 sequence-specific DNA-binding TFs are estimated to be  
474 encoded in the human genome [36]. For example, four TFs (CREB, MYB, NF1, GRF1) were  
475 previously reported to bind the promoter of the *NR3C1* gene to activate or repress its  
476 expression, however their iPWMs exhibiting known primary motifs could not be successfully  
477 derived from ChIP-seq data [3,22]. Regarding the CRISPR-generated knockdown data used  
478 here, TPs were inferred to be direct targets by intersecting promoters with their corresponding  
479 ChIP-seq peaks, which may not be completely accurate, due to the presence of noise peaks  
480 that do not contain true TFBSs [3,37]. In instances where small fold changes in the expression  
481 levels of DE targets were evident, these peaks could arise from compromised efficiency of  
482 knockdowns as a result of suboptimal guide RNAs or the limitations of perturbing only a single  
483 allele of the TF. Finally, the framework developed here only takes into account the 10kb interval  
484 proximal to the TSS, and would not therefore capture long range enhancer effects beyond this

485 distance; by contrast, correlation based approaches have successfully incorporated multiple  
486 definitions of promoter length [14].

## 487 **CONCLUSIONS**

488 The Bray-Curtis similarity measure is able to effectively identify genes with similar tissue-  
489 wide expression profiles. By analysis of promoter information theory-based TF binding profiles  
490 that captured the spatial distribution and information contents of TFBS clusters, ChIP-seq and  
491 chromatin accessibility data, we described a machine learning framework that distinguished  
492 tissue-wide expression profiles of similar vs dissimilar genes and identified direct DE targets of  
493 TFs. Functional binding sites in target genes that significantly alter expression levels upon direct  
494 binding are also distinguished by TF-cofactor coregulation from non-functional sites in non-  
495 targets. Finally, depending on how multiple TFBSs are organized in information-dense clusters  
496 in target gene promoters, sequence variations in these binding sites may be protective, i.e.  
497 resilient to dysregulation or, if deleterious, abrogate their normal transcriptional programs.

## 498 **LIST OF ABBREVIATIONS**

499 TF: transcription factor, TFBS: transcription factor binding site, CRM: *cis*-regulatory modules,  
500 iPWM: information theory-based position weight matrix, IDBC: information density-based  
501 clustering, ChIP-seq: chromatin immunoprecipitation with massively parallel DNA sequencing,  
502 HM: histone modification, mRNA: messenger RNA, siRNA: small interfering RNA, CRISPR:  
503 clustered regularly interspaced short palindromic repeats, DHS: deoxyribonuclease I  
504 hypersensitive region, TP: true positive, TN: true negative, RPKM: reads per kilobase of  
505 transcript per million mapped reads, GTE<sub>x</sub>: genotype-tissue expression, ENCODE:  
506 encyclopedia of DNA elements, TSS: transcription start site, SVM: support vector machine, RBF:  
507 radial basis function, PC: absolute Pearson correlation coefficient, SC: the absolute Spearman

508 correlation coefficient, CARS: the absolute combined angle ratio statistic, SNP: single  
509 nucleotide polymorphism.

## 510 **ADDITIONAL FILES**

511 **Additional file 1:** The workflow of the IDBC algorithm, the mathematical definitions of five  
512 statistical variables to measure classifier performance, and the correlation between  $\varepsilon$  values and  
513 the RF classifier accuracy

514 Format: .docx

515 **Additional file 2:** The lists of TPs and TNs in the machine learning classifiers to predict genes  
516 with similar tissue-wide expression profiles

517 Format: .xlsx

518 **Additional file 3:** The lists of TPs and TNs in the Random Forest classifier to predict DE direct  
519 targets based on the CRISPR-generated knockdown data

520 Format: .xlsx

521 **Additional file 4:** The lists of TPs and TNs in the Random Forest classifier to predict DE direct  
522 targets based on the siRNA-generated knockdown data

523 Format: .xlsx

524 **Additional file 5:** The classifier native performance leaving out intersecting promoters with  
525 DHSs, and the SVM classifier performance on knockdown data

526 Format: .xlsx

527 **Additional file 6:** The list of the most similar 500 genes to each TF in terms of expression  
528 profiles, and the intersection of these 500 genes and DE direct targets of the TF

529 Format: .xlsx

530 **Additional file 7:** Cofactor binding sites adjacent to YY1 and EGR1 sites in the promoters of  
531 their targets and non-targets

532 Format: .docx

533 **Additional file 8:** The percentages of TPs and TNs whose promoters do not overlap DHSs

534 Format: .xlsx

## 535 **DECLARATIONS**

### 536 **Ethics approval and consent to participate**

537 Not applicable

### 538 **Consent for publication**

539 Not applicable

### 540 **Availability of data and materials**

541 The median RPKM, TSS coordinate, DNase I hypersensitivity and ChIP-seq data are  
542 respectively available from the GTEx Analysis V6p release ([www.gtexportal.org](http://www.gtexportal.org)), Ensembl  
543 Biomart ([www.ensembl.org](http://www.ensembl.org)) and ENCODE ([www.encodeproject.org](http://www.encodeproject.org)). The CRISPR- and siRNA-  
544 generated knockdown data are available from the supplementary information files of Dixit et al.  
545 [15] and Cusanovich et al. [13]. The code implementing this machine learning framework is  
546 available in Zenodo (<https://doi.org/10.5281/zenodo.1145458>). All other data supporting the  
547 findings of this study are available within the article and its supplementary information files.

### 548 **Competing interests**

549 PKR is the inventor of US Patent 5,867,402 and other patents pending, which apply iPWMs to  
550 the prediction and validation of mutations. He cofounded Cytognomix, Inc., which is developing  
551 software based on this technology for complete genome or exome mutation analysis.

## 552 **Funding**

553 Natural Sciences and Engineering Research Council of Canada Discovery Grant [RGPIN-2015-  
554 06290]; Canada Foundation for Innovation; Canada Research Chairs; Cytognomix Inc. Funding  
555 for open access charge: University of Western Ontario and the Natural Sciences and  
556 Engineering Research Council.

## 557 **Authors' contributions**

558 PKR defined the objectives and directed the study. RL and PKR devised the general machine  
559 learning framework. RL implemented this framework and collected the results. Both RL and  
560 PKR interpreted the results and wrote the manuscript.

## 561 **Acknowledgements**

562 We are grateful to Ben Shirley and Eliseos Mucaki for constructive comments on the paper.

## 563 **REFERENCES**

- 564 1. Hosseinpour B, Bakhtiarzadeh MR, Khosravi P, Ebrahimie E. Predicting distinct organization  
565 of transcription factor binding sites on the promoter regions: a new genome-based approach to  
566 expand human embryonic stem cell regulatory network. *Gene*. 2013;531:212–9.
- 567 2. Ezer D, Zabet NR, Adryan B. Homotypic clusters of transcription factor binding sites: A model  
568 system for understanding the physical mechanics of gene expression. *Comput. Struct.*  
569 *Biotechnol. J.* 2014;10:63–9.
- 570 3. Lu R, Mucaki EJ, Rogan PK. Discovery and validation of information theory-based  
571 transcription factor and cofactor binding site motifs. *Nucleic Acids Res.* 2017;45:e27.
- 572 4. Bi C, Rogan PK. Bipartite pattern discovery by entropy minimization-based multiple local  
573 alignment. *Nucleic Acids Res.* 2004;32:4979–91.
- 574 5. Dinakarandian D, Raheja V, Mehta S, Schuetz EG, Rogan PK. Tandem machine learning  
575 for the identification of genes regulated by transcription factors. *BMC Bioinformatics.* 2005;6:204.



- 576 6. Ouyang Z, Zhou Q, Wong WH. ChIP-Seq of transcription factors predicts absolute and  
577 differential gene expression in embryonic stem cells. *Proc. Natl. Acad. Sci. U. S. A.*  
578 2009;106:21521–6.
- 579 7. Cheng C, Alexander R, Min R, Leng J, Yip KY, Rozowsky J, et al. Understanding  
580 transcriptional regulation by integrative analysis of transcription factor binding data. *Genome*  
581 *Res.* 2012;22:1658–67.
- 582 8. Budden DM, Hurley DG, Cursons J, Markham JF, Davis MJ, Crampin EJ. Predicting  
583 expression: the complementary power of histone modification and transcription factor binding  
584 data. *Epigenetics Chromatin.* 2014;7:36.
- 585 9. Smith AD, Sumazin P, Xuan Z, Zhang MQ. DNA motifs in human and mouse proximal  
586 promoters predict tissue-specific expression. *Proc. Natl. Acad. Sci. U. S. A.* 2006;103:6275–80.
- 587 10. McLeay RC, Lesluyes T, Cuellar Partida G, Bailey TL. Genome-wide in silico prediction of  
588 gene expression. *Bioinforma. Oxf. Engl.* 2012;28:2789–96.
- 589 11. Karlič R, Chung H-R, Lasserre J, Vlahovicek K, Vingron M. Histone modification levels are  
590 predictive for gene expression. *Proc. Natl. Acad. Sci. U. S. A.* 2010;107:2926–31.
- 591 12. Dong X, Greven MC, Kundaje A, Djebali S, Brown JB, Cheng C, et al. Modeling gene  
592 expression using chromatin features in various cellular contexts. *Genome Biol.* 2012;13:R53.
- 593 13. Cusanovich DA, Pavlovic B, Pritchard JK, Gilad Y. The functional consequences of variation  
594 in transcription factor binding. *PLoS Genet.* 2014;10:e1004226.
- 595 14. Banks CJ, Joshi A, Michoel T. Functional transcription factor target discovery via compendia  
596 of binding and expression profiles. *Sci. Rep.* 2016;6:20649.
- 597 15. Dixit A, Parnas O, Li B, Chen J, Fulco CP, Jerby-Arnon L, et al. Perturb-Seq: Dissecting  
598 Molecular Circuits with Scalable Single-Cell RNA Profiling of Pooled Genetic Screens. *Cell.*  
599 2016;167:1853–1866.e17.
- 600 16. Cui S, Youn E, Lee J, Maas SJ. An improved systematic approach to predicting transcription  
601 factor target genes using support vector machine. *PLoS One.* 2014;9:e94519.
- 602 17. Bray JR, Curtis JT. An Ordination of the Upland Forest Communities of Southern Wisconsin.  
603 *Ecol. Monogr.* 1957;27:325–349.
- 604 18. GTEx Consortium. The Genotype-Tissue Expression (GTEx) project. *Nat. Genet.*  
605 2013;45:580–5.
- 606 19. ENCODE Project Consortium. An integrated encyclopedia of DNA elements in the human  
607 genome. *Nature.* 2012;489:57–74.
- 608 20. Thurman RE, Rynes E, Humbert R, Vierstra J, Maurano MT, Haugen E, et al. The  
609 accessible chromatin landscape of the human genome. *Nature.* 2012;489:75–82.
- 610 21. Hall M, Frank E, Holmes G, Pfahringer B, Reutemann P, Witten IH. The WEKA Data Mining  
611 Software: An Update. *SIGKDD Explor Newsl.* 2009;11:10–18.

- 612 22. Vandevyver S, Dejager L, Libert C. Comprehensive overview of the structure and regulation  
613 of the glucocorticoid receptor. *Endocr. Rev.* 2014;35:671–93.
- 614 23. Kent WJ, Sugnet CW, Furey TS, Roskin KM, Pringle TH, Zahler AM, et al. The human  
615 genome browser at UCSC. *Genome Res.* 2002;12:996–1006.
- 616 24. Sherry ST, Ward MH, Kholodov M, Baker J, Phan L, Smigielski EM, et al. dbSNP: the NCBI  
617 database of genetic variation. *Nucleic Acids Res.* 2001;29:308–11.
- 618 25. Calvo SE, Clauser KR, Mootha VK. MitoCarta2.0: an updated inventory of mammalian  
619 mitochondrial proteins. *Nucleic Acids Res.* 2016;44:D1251-1257.
- 620 26. Cunningham JT, Rodgers JT, Arlow DH, Vazquez F, Mootha VK, Puigserver P. mTOR  
621 controls mitochondrial oxidative function through a YY1-PGC-1alpha transcriptional complex.  
622 *Nature.* 2007;450:736–40.
- 623 27. Tallack MR, Perkins AC. KLF1 directly coordinates almost all aspects of terminal erythroid  
624 differentiation. *IUBMB Life.* 2010;62:886–90.
- 625 28. Seto E, Lewis B, Shenk T. Interaction between transcription factors Sp1 and YY1. *Nature.*  
626 1993;365:462–4.
- 627 29. Ferrari-Amorotti G, Mariani SA, Novi C, Cattelani S, Pecorari L, Corradini F, et al. The  
628 biological effects of C/EBPalpha in K562 cells depend on the potency of the N-terminal  
629 regulatory region, not on specificity of the DNA binding domain. *J. Biol. Chem.* 2010;285:30837–  
630 50.
- 631 30. Huang RP, Fan Y, Ni Z, Mercola D, Adamson ED. Reciprocal modulation between Sp1 and  
632 Egr-1. *J. Cell. Biochem.* 1997;66:489–99.
- 633 31. Bell AC, West AG, Felsenfeld G. The protein CTCF is required for the enhancer blocking  
634 activity of vertebrate insulators. *Cell.* 1999;98:387–96.
- 635 32. Wang LC, Swat W, Fujiwara Y, Davidson L, Visvader J, Kuo F, et al. The TEL/ETV6 gene is  
636 required specifically for hematopoiesis in the bone marrow. *Genes Dev.* 1998;12:2392–402.
- 637 33. Tian L, Liu J, Xia G-H, Chen B-A. RNAi-mediated knockdown of MCM7 gene on CML cells  
638 and its therapeutic potential for leukemia. *Med. Oncol. Northwood Lond. Engl.* 2017;34:21.
- 639 34. Maifrede S, Liebermann D, Hoffman B. Egr-1, a Stress Response Transcription Factor and  
640 Myeloid Differentiation Primary Response Gene, Behaves As Tumor Suppressor in CML. *Blood.*  
641 2014;124:2211.
- 642 35. Kimura M. The neutral theory of molecular evolution. *Sci. Am.* 1979;241:98–100, 102, 108  
643 passim.
- 644 36. Vaquerizas JM, Kummerfeld SK, Teichmann SA, Luscombe NM. A census of human  
645 transcription factors: function, expression and evolution. *Nat. Rev. Genet.* 2009;10:252–63.
- 646 37. Kidder BL, Hu G, Zhao K. ChIP-Seq: technical considerations for obtaining high-quality data.  
647 *Nat. Immunol.* 2011;12:918–22.

648

## 649 **FIGURE LEGENDS**

### 650 **Figure 1. General framework for predicting genes with similar tissue-wide expression** 651 **profiles and DE direct TF targets**

652 **A)** An overview of the machine learning framework. The steps enclosed in the dashed  
653 rectangle and for forming training and test sets vary across prediction of genes with similar  
654 expression profiles and DE direct TF targets. The step with a dash-dotted border that intersects  
655 promoters with DHSs is a variant of the primary approach that provided more accurate results.  
656 In the IDBC algorithm (Additional file 1), the parameter  $l$  is the minimum threshold on the total  
657 information contents of TFBS clusters. In prediction of genes with similar expression profiles,  
658 the minimum value was 939, which was the sum of mean information contents ( $R_{sequence}$  values)  
659 of all 94 iPWMs; in prediction of direct targets, this value was the  $R_{sequence}$  value of the single  
660 iPWM used to detect TFBSs in each promoter. The parameter  $d$  is the radius of initial clusters in  
661 base pairs, whose value, 25, was determined empirically. Eight types of three different  
662 classifiers were evaluated with statistics (accuracy, sensitivity and specificity) to measure the  
663 classifier performance (Additional file 1). **B)** Formation of the training and test sets for identifying  
664 genes with similar expression profiles to a given gene (Additional file 2). **C)** Formation of the  
665 training and test sets for predicting direct targets of seven TFs using the CRISPR-generated  
666 perturbation data in K562 cells (Additional file 3). **D)** Formation of the training and test sets for  
667 predicting direct targets of 11 TFs using the siRNA-generated knockdown data in GM19238  
668 cells (Additional file 4). When genes with single transcripts were more than the TPs, those with  
669 the largest P-values were selected as TNs (null hypothesis of differential expression cannot be  
670 rejected); when genes with single transcripts were fewer than the TPs, those genes with two  
671 transcripts and the largest P-values were also selected. This step was iterated until the number  
672 of TNs equaled that of TPs.

673 **Figure 2. Expression profiles of NR3C1, SLC25A32 and TANK**

674 Visualization of the expression values (in RPKM) of these genes across 53 tissues from  
675 GTEx. For each gene, the colored rectangle belonging to each tissue indicates the valid RPKM  
676 of all samples in the tissue, the black horizontal bar in the rectangle indicates the median RPKM,  
677 the hollow circles indicate the RPKM of the samples considered as outliers, and the grey vertical  
678 bar indicates the sampling error. By comparing the pictures, the overall expression patterns of  
679 the three genes across the 53 tissues resemble each other (e.g. all three genes exhibit the  
680 highest expression levels in lymphocytes and the lowest levels in brain tissues).

681 **Figure 3. Accuracy of the Random Forest classifier when using three different values**  
682 **for  $\epsilon$**

683 **A)** The accuracy of the classifier on the training sets of the TFs based on 10-fold cross  
684 validation. Binding site clusters were derived intersecting promoters with DHSs, for different  
685 minimum threshold  $\epsilon$  values (i.e. 1.01, 1.05 and 1.1) corresponding to the average fold change  
686 in gene expression levels under all guide RNAs of the TF. **B)** The accuracy on the test sets. As  
687  $\epsilon$  increased, accuracy on the training sets also increased.

688 **Figure 4. Mutation analyses on the target MCM7 in the test set of EGR1**

689 This figure depicts the effect of a mutation in each EGR1 binding site cluster of the MCM7  
690 promoter on the expression level of MCM7, which is a target of the TF EGR1. The strongest  
691 binding site in each cluster were abolished by a single nucleotide variant. Upon loss of all three  
692 clusters, only weak binding sites remained and EGR1 was predicted to no longer be able to  
693 effectively regulate MCM7 expression. Multiple clusters in the promoters of TF targets confers  
694 robustness against mutations within individual binding sites that define these clusters.

695 **TABLES**

696 **Table 1. Performance of machine learning classifiers for predicting genes with similar**  
 697 **expression profiles to NR3C1**

| Classifier    |                                  | After intersecting promoters with DHSs |              |              |              |              |              |
|---------------|----------------------------------|----------------------------------------|--------------|--------------|--------------|--------------|--------------|
|               |                                  | Training set <sup>§</sup>              |              |              | Test set     |              |              |
|               |                                  | Accuracy                               | Sensitivity  | Specificity  | Accuracy     | Sensitivity  | Specificity  |
| Naïve Bayes   |                                  | 0.964                                  | 0.992        | 0.936        | 0.956        | 0.968        | 0.944        |
| Decision tree | J48 tree                         | 0.960                                  | 0.960        | 0.960        | 0.970        | 0.952        | 0.988        |
|               | Random tree                      | 0.936                                  | 0.940        | 0.932        | 0.936        | 0.912        | 0.960        |
|               | <b>Random forest<sup>†</sup></b> | <b>0.972</b>                           | <b>0.976</b> | <b>0.968</b> | <b>0.976</b> | <b>0.964</b> | <b>0.988</b> |
| SVM           | <b>RBF kernel<sup>†</sup></b>    | <b>0.972</b>                           | <b>0.976</b> | <b>0.968</b> | <b>0.976</b> | <b>0.964</b> | <b>0.988</b> |
|               | Polynomial kernel of exponent 1  | 0.964                                  | 0.960        | 0.968        | 0.968        | 0.944        | 0.992        |
|               | Polynomial kernel of exponent 2  | 0.976                                  | 0.968        | 0.984        | 0.964        | 0.936        | 0.992        |
|               | Polynomial kernel of exponent 3  | 0.960                                  | 0.932        | 0.988        | 0.958        | 0.920        | 0.996        |

698 <sup>†</sup> The two best-performing classifiers were bolded.

699 <sup>§</sup> The results on the training set was obtained using 10-fold cross validation.

700

701 **Table 2. The Random Forest classifier performance for predicting direct TF targets using**  
702 **the CRISPR-generated data**

| TF <sup>†</sup> | After intersecting promoters with DHSs |             |             |          |             |             |
|-----------------|----------------------------------------|-------------|-------------|----------|-------------|-------------|
|                 | Training set <sup>§</sup>              |             |             | Test set |             |             |
|                 | Accuracy                               | Sensitivity | Specificity | Accuracy | Sensitivity | Specificity |
| EGR1            | 0.879                                  | 0.943       | 0.816       | 0.845    | 0.954       | 0.736       |
| ELF1            | 0.846                                  | 0.923       | 0.769       | 0.863    | 0.900       | 0.825       |
| ELK1            | 0.862                                  | 0.897       | 0.828       | 0.793    | 0.948       | 0.638       |
| ETS1            | 0.810                                  | 0.912       | 0.708       | 0.779    | 0.899       | 0.659       |
| GABPA           | 0.819                                  | 0.932       | 0.706       | 0.770    | 0.94        | 0.600       |
| IRF1            | 0.792                                  | 0.860       | 0.725       | 0.735    | 0.860       | 0.610       |
| YY1             | 0.595                                  | 0.559       | 0.631       | 0.587    | 0.535       | 0.638       |

703 <sup>†</sup> The results for all seven TFs were obtained when setting  $\varepsilon$  to 1.05, and the transcriptome data  
704 generated by CRISPR-based TF knockdowns were obtained from Dixit et al [15].

705 <sup>§</sup> The results on the training sets was obtained using 10-fold cross validation.

706

707 **Table 3. The Random Forest classifier performance for predicting direct TF targets using**  
708 **the siRNA-generated data**

| TF <sup>†</sup> | After intersecting promoters with DHSs |             |             |          |             |             |
|-----------------|----------------------------------------|-------------|-------------|----------|-------------|-------------|
|                 | Training set <sup>§</sup>              |             |             | Test set |             |             |
|                 | Accuracy                               | Sensitivity | Specificity | Accuracy | Sensitivity | Specificity |
| BATF            | 0.625                                  | 0.646       | 0.604       | 0.706    | 0.649       | 0.763       |
| JUND            | 0.625                                  | 0.646       | 0.604       | 0.682    | 0.682       | 0.682       |
| NFE2L1          | 0.633                                  | 0.533       | 0.733       | 0.75     | 0.667       | 0.833       |
| PAX5            | 0.575                                  | 0.614       | 0.537       | 0.627    | 0.563       | 0.691       |
| POU2F2          | 0.725                                  | 0.818       | 0.633       | 0.651    | 0.796       | 0.505       |
| RELA            | 0.591                                  | 0.619       | 0.563       | 0.690    | 0.611       | 0.770       |
| RXRA            | 0.731                                  | 0.813       | 0.648       | 0.663    | 0.793       | 0.533       |
| SP1             | 0.561                                  | 0.571       | 0.551       | 0.579    | 0.539       | 0.620       |
| TCF12           | 0.564                                  | 0.638       | 0.491       | 0.684    | 0.597       | 0.770       |
| USF1            | 0.737                                  | 0.753       | 0.721       | 0.723    | 0.71        | 0.735       |
| YY1             | 0.611                                  | 0.456       | 0.765       | 0.601    | 0.396       | 0.807       |

709 <sup>†</sup> The transcriptome data generated by siRNA-based TF knockdowns were obtained from  
710 Cusanovich et al [13].

711 <sup>§</sup> The results on the training sets was obtained using 10-fold cross validation.

712

713 **Table 4. Intersection of direct targets and 500 genes with the most similar expression**  
 714 **profiles**

| TF     | Cell line | Number of targets | Size of intersection | Targets among the most similar 10 genes <sup>§</sup>                                                                                                |
|--------|-----------|-------------------|----------------------|-----------------------------------------------------------------------------------------------------------------------------------------------------|
| EGR1   | K562      | 174               | 11                   | None                                                                                                                                                |
| ELF1   |           | 79                | 5                    | None                                                                                                                                                |
| ELK1   |           | 116               | 4                    | GNL1(8 <sup>th</sup> )                                                                                                                              |
| ETS1   |           | 275               | 14                   | None                                                                                                                                                |
| GABPA  |           | 530               | 24                   | TAF1(1 <sup>st</sup> )                                                                                                                              |
| IRF1   |           | 472               | 11                   | None                                                                                                                                                |
| YY1    |           | 1797              | 125                  | MRPL9(2 <sup>nd</sup> ), BAZ1B(6 <sup>th</sup> ), ENY2(7 <sup>th</sup> ), NUB1(8 <sup>th</sup> ), USP1(9 <sup>th</sup> ), HNRNPR(10 <sup>th</sup> ) |
|        | GM19238   | 1066              | 61                   | MED4(1 <sup>st</sup> ), SURF6(3 <sup>rd</sup> ), BAZ1B(6 <sup>th</sup> )                                                                            |
| BATF   |           | 193               | 4                    | MB21D1(4 <sup>th</sup> ), C16orf87(9 <sup>th</sup> )                                                                                                |
| JUND   |           | 44                | 2                    | None                                                                                                                                                |
| NFE2L1 |           | 60                | 3                    | None                                                                                                                                                |
| RELA   |           | 252               | 22                   | HMG20B(9 <sup>th</sup> )                                                                                                                            |
| RXRA   |           | 183               | 7                    | None                                                                                                                                                |
| SP1    |           | 1630              | 96                   | ACLY(1 <sup>st</sup> ), SEC22B(7 <sup>th</sup> ), GPX1P1(10 <sup>th</sup> )                                                                         |
| TCF12  |           | 669               | 19                   | None                                                                                                                                                |
| USF1   |           | 309               | 20                   | None                                                                                                                                                |
| PAX5   |           | 938               | 76                   | IL21R(9 <sup>th</sup> )                                                                                                                             |
| POU2F2 |           | 550               | 21                   | CD86(3 <sup>rd</sup> )                                                                                                                              |

715 <sup>§</sup> The rank of each target in the list of similar genes in the descending order of Bray-Curtis  
 716 similarity values is shown in the brackets immediately following the target.



717 **Table 5. Mutation analyses on promoters of direct targets**

| TF                                              | Target                                              | Normal cluster | Normal allele <sup>§</sup>                           | SNP ID <sup>§</sup>                 | Variant allele <sup>§</sup>                           | Variant cluster <sup>‡</sup> | Classifier output    |           |   |   |
|-------------------------------------------------|-----------------------------------------------------|----------------|------------------------------------------------------|-------------------------------------|-------------------------------------------------------|------------------------------|----------------------|-----------|---|---|
|                                                 |                                                     |                |                                                      |                                     |                                                       |                              | Variant <sup>†</sup> | Wild-type |   |   |
| EGR1<br>( $R_{\text{sequence}} = 12.2899$ bits) | EID2B                                               | Cluster 1 of 2 | <b>GAGGGGGCATC</b><br>(chr19:39540286, -, 7.22 bits) | rs538610162<br>(chr19:39540296C>G)  | <b>CAGGGGGCATC</b><br>(chr19:39540286, -, 4.84 bits)  | Abolished                    | v                    | x         | v |   |
|                                                 |                                                     |                |                                                      | rs759233998<br>(chr19:39540294C>T)  | <b>GAAGGGGGCATC</b><br>(chr19:39540286, -, 0.06 bit)  | Abolished                    | v                    |           |   |   |
|                                                 |                                                     |                |                                                      | rs974735901<br>(chr19:39540288T>A)  | <b>GAGGGGGCTTC</b><br>(chr19:39540286, -, 6.90 bits)  | Cluster 1 of 2               | v                    |           |   |   |
|                                                 |                                                     |                |                                                      | rs978230260<br>(chr19:39540287A>T)  | <b>GAGGGGGCAAC</b><br>(chr19:39540286, -, 5.31 bits)  | Abolished                    | v                    |           |   |   |
|                                                 |                                                     | Cluster 2 of 2 | <b>GCGTGCCTGGG</b><br>(chr19:39540162, +, 1.59 bits) | rs764734511<br>(chr19:39540162G>A)  | <b>ACGTGCCTGGG</b><br>(chr19:39540162, +, -0.72 bit)  | Cluster 2 of 2               | v                    |           |   | v |
|                                                 |                                                     |                |                                                      | (chr19:39540162G>C)                 | <b>CCGTGCCTGGG</b><br>(chr19:39540162, +, -0.79 bit)  | Cluster 2 of 2               | v                    |           |   |   |
|                                                 |                                                     |                | <b>GCGTGGGCGCT</b><br>(chr19:39540166, +, 9.72 bits) | rs996639427<br>(chr19:39540170G>C)  | <b>GCGTGCCTCGG</b><br>(chr19:39540162, +, -5.21 bits) | Abolished                    | v                    |           |   |   |
|                                                 |                                                     |                |                                                      | (chr19:39540165, +, -0.85 bit)      | <b>GCGTGGGCGCT</b><br>(chr19:39540165, +, -0.85 bit)  |                              |                      |           |   |   |
|                                                 |                                                     |                |                                                      | rs1027751538<br>(chr19:39540174G>A) | <b>GCGTGGGCACT</b><br>(chr19:39540166, +, 5.16 bits)  | Abolished                    | v                    |           |   |   |
|                                                 |                                                     |                |                                                      | rs887888062<br>(chr19:39540176T>A)  | <b>GCGTGGGCGCA</b><br>(chr19:39540166, +, 10.94 bits) | Cluster 2 of 2               | v                    |           |   |   |
| ELF1<br>( $R_{\text{sequence}} = 11.2057$ bits) | HIST1H4<br>H                                        | Cluster 1 of 2 | <b>GCGGAAGCGTG</b><br>(chr6:26286540, +, 9.92 bits)  | rs760968937<br>(chr6:26286547C>T)   | <b>GCGGAAGTGTG</b><br>(chr6:26286540, +, 10.71 bits)  | Cluster 1 of 2               | v                    | v         | v |   |
|                                                 |                                                     |                |                                                      | (chr6:26286547C>A)                  | <b>GCGGAAGAGTG</b><br>(chr6:26286540, +, 8.84 bits)   | Cluster 1 of 2               | v                    |           |   |   |
|                                                 |                                                     |                |                                                      | rs1000196206<br>(chr6:26286542G>C)  | <b>GCGGAAGCGTG</b><br>(chr6:26286540, +, -6.26 bits)  | Abolished                    | v                    |           |   |   |
|                                                 |                                                     |                |                                                      | rs144759258<br>(chr6:26286543G>A)   | <b>GCGAAAGCGTG</b><br>(chr6:26286540, +, -3.60 bits)  | Abolished                    | v                    | x         |   |   |
|                                                 |                                                     |                |                                                      | rs966435996<br>(chr6:26286544A>G)   | <b>GCGGGAGCGTG</b><br>(chr6:26286540, +, 5.28 bits)   | Abolished                    | v                    |           |   |   |
| rs950986427<br>(chr6:26286548G>A)               | <b>GCGGAAGCATG</b><br>(chr6:26286540, +, 5.28 bits) | Cluster 1 of 2 | v                                                    |                                     |                                                       |                              |                      |           |   |   |

|                                                       |                                                                 |                                                 |                                                      |                                                        |                                                               |                                                      |                                                       |           |   |   |
|-------------------------------------------------------|-----------------------------------------------------------------|-------------------------------------------------|------------------------------------------------------|--------------------------------------------------------|---------------------------------------------------------------|------------------------------------------------------|-------------------------------------------------------|-----------|---|---|
|                                                       |                                                                 |                                                 |                                                      |                                                        | + , 8.28 bits)                                                |                                                      |                                                       |           |   |   |
|                                                       |                                                                 | Cluster 2 of 2                                  | <b>CAGGAGATGCG</b><br>(chr6:26286473, -, 6.98 bits)  | rs373649904<br>(chr6:26286483G>A)                      | <b>TAGGAGATGCG</b><br>(chr6:26286473, -, 0.61 bit)            | Abolished                                            | ✓                                                     |           |   |   |
|                                                       |                                                                 |                                                 |                                                      | rs926919149<br>(chr6:26286480C>T)                      | <b>CAGAAGATGCG</b><br>(chr6:26286473, -, -6.53 bits)          | Abolished                                            | ✓                                                     |           |   |   |
|                                                       |                                                                 |                                                 |                                                      | rs751263172<br>(chr6:26286479T>G)                      | <b>CAGGCGATGCG</b><br>(chr6:26286473, -, 1.24 bits)           | Abolished                                            | ✓                                                     |           |   |   |
|                                                       |                                                                 |                                                 |                                                      | rs369076253<br>(chr6:26286473C>G)                      | <b>CAGGAGATGCC</b><br>(chr6:26286473, -, 6.92 bits)           | Cluster 2 of 2                                       | ✓                                                     |           |   |   |
|                                                       |                                                                 |                                                 |                                                      | <u>rs751263172</u><br>( <u>chr6:1044474314C&gt;T</u> ) | <u>CAGGAAATGCG</u><br>( <u>chr6:26286473</u> , -, 11.43 bits) | Cluster 2 of 2                                       | ✓                                                     | ✓         |   |   |
| ELK1<br>( $R_{\text{sequence}} = 11.9041$ bits)       | GOS2                                                            | Cluster 1 of 2                                  | <b>CAGGGAAGACC</b><br>(chr1:209667959, -, 1.92 bits) | rs146048477<br>(chr1:209667961T>A)                     | <b>CAGGGAAGTCC</b><br>(chr1:209667959, -, 2.24 bits)          | Cluster 1 of 2                                       | ✓                                                     | ✓         |   |   |
|                                                       |                                                                 |                                                 |                                                      | rs887606802<br>(chr1:209667968T>C)                     | <b>CGGGGAAGACC</b><br>(chr1:209667959, -, -3.35 bits)         | Cluster 1 of 2                                       | ✓                                                     |           |   |   |
|                                                       |                                                                 |                                                 |                                                      | rs1021034916<br>(chr1:209667967C>T)                    | <b>CAAGGAAGACC</b><br>(chr1:209667959, -, -3.57 bits)         | Cluster 1 of 2                                       | ✓                                                     |           |   |   |
|                                                       |                                                                 |                                                 |                                                      | GAGGAAATGAG<br>(chr1:209667969, +, 8.14 bits)          | rs941962117<br>(chr1:209667974A>G)                            | <b>GAGGAGATGAG</b><br>(chr1:209667969, +, 4.11 bits) | Abolished                                             | ✓         |   |   |
|                                                       |                                                                 | Cluster 2 of 2                                  | <b>CTGGAAGAGCA</b><br>(chr1:209673544, -, 5.91 bits) | rs896117033<br>(chr1:209673545G>A)                     | <b>CTGGAAGAGTA</b><br>(chr1:209673544, -, 3.95 bits)          | Cluster 2 of 2                                       | ✓                                                     | ×         | ✓ |   |
|                                                       |                                                                 |                                                 |                                                      | rs971962577<br>(chr1:209673546C>T)                     | <b>CTGGAAGAACA</b><br>(chr1:209673544, -, 3.49 bits)          | Cluster 2 of 2                                       | ✓                                                     |           |   |   |
|                                                       |                                                                 |                                                 |                                                      | rs1011969709<br>(chr1:209673554G>C)                    | <b>GTGGAAGAGCA</b><br>(chr1:209673544, -, 3.92 bits)          | Abolished                                            | ✓                                                     |           |   |   |
|                                                       |                                                                 |                                                 |                                                      | <b>CCAGAAGTCAA</b><br>(chr1:209673551, +, 7.44 bits)   | <b>CCACAAGTCAA</b><br>(chr1:209673551, +, -5.50 bits)         |                                                      |                                                       |           |   |   |
|                                                       |                                                                 |                                                 |                                                      | <u>rs1023312090</u><br>( <u>chr1:209673561A&gt;G</u> ) | <u>CCAGAAGTCAG</u><br>( <u>chr1:209673551</u> , +, 8.40 bits) | Cluster 2 of 2                                       | ✓                                                     | ✓         |   |   |
|                                                       |                                                                 | ETS1<br>( $R_{\text{sequence}} = 10.0788$ bits) | TTC19                                                | Cluster 1 of 1                                         | <b>GCAGGGAAAGG</b><br>(chr17:16022293, +, 7.92 bits)          | rs1022234223<br>(chr17:16022296G>C)                  | <b>GCACGGAAAGG</b><br>(chr17:16022293, +, -4.98 bits) | Abolished | × | × |
| <u>rs968299415</u><br>( <u>chr17:16022301A&gt;T</u> ) | <u>GCAGGGAAATGG</u><br>( <u>chr17:16022293</u> , +, 10.01 bits) |                                                 |                                                      |                                                        |                                                               | Cluster 1 of 1                                       | ✓                                                     | ✓         |   |   |
| GABPA<br>( $R_{\text{sequence}} =$                    | PLEKHB2                                                         | Cluster 1 of 1                                  | <b>ACAGGAAAGGG</b><br>(chr2:131112770,               | rs997328042<br>(chr2:131112771C>T)                     | <b>ATAGGAAAGGG</b><br>(chr2:131112770,                        | Abolished                                            | ×                                                     | ×         | ✓ |   |

|                                                 |                                    |                                                  |                                                    |                                                          |                                                    |                                                    |                   |   |   |   |
|-------------------------------------------------|------------------------------------|--------------------------------------------------|----------------------------------------------------|----------------------------------------------------------|----------------------------------------------------|----------------------------------------------------|-------------------|---|---|---|
| 10.8567 bits)                                   |                                    |                                                  | +, 10.36 bits)                                     |                                                          |                                                    |                                                    |                   |   |   |   |
|                                                 |                                    |                                                  |                                                    | rs1020720126<br>(chr2:131112773G>C)                      | ACACGAAAGGG<br>(chr2:131112770,<br>+, -4.16 bits)  | Abolished                                          | ×                 |   |   |   |
|                                                 |                                    |                                                  |                                                    | TCTGGAAACTA<br>(chr2:131112760,<br>+, 1.53 bits)         | rs185306857<br>(chr2:131112761C>A)                 | TATGGAAACTA<br>(chr2:131112760,<br>+, -2.86 bits)  | Cluster 1<br>of 1 | ✓ |   |   |
|                                                 |                                    |                                                  |                                                    |                                                          | rs772728699<br>(chr2:131112762T>A)                 | TCAGGAAACTA<br>(chr2:131112760,<br>+, 5.23 bits)   | Cluster 1<br>of 1 | ✓ |   |   |
|                                                 | rs965753671<br>(chr2:131112769T>C) | TCTGGAAACCA<br>(chr2:131112760,<br>+, 2.13 bits) | Cluster 1<br>of 1                                  | ✓                                                        |                                                    |                                                    |                   |   |   |   |
| IRF1<br>( $R_{\text{sequence}} = 13.5544$ bits) | SMIM13                             | Cluster 1<br>of 1                                | GAGAATGAAAGCA<br>(chr6:11093663,<br>+, 12.56 bits) | rs950528541<br>(chr6:11093663G>C)                        | CAGAATGAAAGCA<br>(chr6:11093663,<br>+, 8.97 bits)  | Cluster 1<br>of 1                                  | ✓                 | × | ✓ |   |
|                                                 |                                    |                                                  |                                                    | rs886259573<br>(chr6:11093664A>G)                        | GGAATGAAAGCA<br>(chr6:11093663,<br>+, 9.65 bits)   | Cluster 1<br>of 1                                  | ✓                 |   |   |   |
|                                                 |                                    |                                                  |                                                    | rs982931728<br>(chr6:11093666A>G)                        | GAGGATGAAAGCA<br>(chr6:11093663,<br>+, 8.09 bits)  | Cluster 1<br>of 1                                  | ✓                 |   |   |   |
|                                                 |                                    |                                                  |                                                    | rs1020218811<br>(chr6:11093668T>G)                       | GAGAAGGAAAGCA<br>(chr6:11093663,<br>+, 9.36 bits)  | Cluster 1<br>of 1                                  | ✓                 |   |   |   |
|                                                 |                                    |                                                  |                                                    | rs570723026<br>(chr6:11093672A>G)                        | GAGAATGAAGGCA<br>(chr6:11093663,<br>+, 8.01 bits)  | Cluster 1<br>of 1                                  | ✓                 |   |   |   |
|                                                 |                                    |                                                  |                                                    | rs1004825794<br>(chr6:11093675A>C)<br>(chr6:11093675A>T) | GAGAATGAAAGCC<br>(chr6:11093663,<br>+, 10.47 bits) | Cluster 1<br>of 1                                  | ✓                 |   |   |   |
|                                                 |                                    |                                                  |                                                    |                                                          | GAGAATGAAAGCA<br>(chr6:11093663,<br>+, 10.42 bits) | Cluster 1<br>of 1                                  | ✓                 |   |   |   |
|                                                 |                                    |                                                  |                                                    | AAGACCAAAGGCA<br>(chr6:11093641,<br>+, 2.43 bits)        | rs1030185383<br>(chr6:11093649A>C)                 | AAGACCAAAGGCA<br>(chr6:11093641,<br>+, -3.39 bits) | Cluster 1<br>of 1 |   |   | ✓ |
|                                                 |                                    |                                                  |                                                    |                                                          | rs5874306<br>(chr6:11093650delG)                   | AAGACCAAAGCAG<br>(chr6:11093641,<br>+, 0.90 bit)   | Cluster 1<br>of 1 |   |   | ✓ |
|                                                 |                                    |                                                  |                                                    |                                                          | rs558896490<br>(chr6:11093643G>A)                  | AAACCAAAGGCA<br>(chr6:11093641,<br>+, 7.06 bits)   | Cluster 1<br>of 1 |   |   | ✓ |
| YY1<br>( $R_{\text{sequence}} = 12.8554$ bits)  | CKLF                               | Cluster 1<br>of 1                                | GCGGCCATCGGC<br>(chr16:66549785,<br>-, 10.06 bits) | rs865922947<br>(chr16:66549791G>A)                       | CCGCCATCGGC<br>(chr16:66549785,<br>-, 6.80 bits)   | Cluster 1                                          | ✓                 | × | ✓ |   |
|                                                 |                                    |                                                  |                                                    | rs946037930<br>(chr16:66549794C>A)                       | GCTGCCATCGGC<br>(chr16:66549785,<br>-, 8.02 bits)  | Cluster 1                                          | ✓                 |   |   |   |
|                                                 |                                    |                                                  |                                                    | rs917218063<br>(chr16:66549793C>T)                       | GCGACCATCGGC<br>(chr16:66549785,<br>-, 5.41 bits)  | Abolished                                          | ×                 |   |   |   |

|  |  |  |                                           |                                    |                                                           |           |   |  |  |
|--|--|--|-------------------------------------------|------------------------------------|-----------------------------------------------------------|-----------|---|--|--|
|  |  |  |                                           | rs928017336<br>(chr16:66549791G>A) | <b>GCGGCTATCGGC</b><br>(chr16:66549785,<br>-, -3.62 bits) | Abolished | × |  |  |
|  |  |  | GCCGCCCGTC (chr16:66549792, +, 1.34 bits) |                                    |                                                           |           |   |  |  |

718 § All coordinates are based on the hg38 genome assembly. A bold italic letter in a binding site  
719 sequence indicates the base where a SNP occurs. The SNPs strengthening binding sites and  
720 corresponding variant binding site sequences are underlined.

721 ‡ The impact on whether the occurrence of a single SNP resulted in the disappearance of the  
722 cluster containing it is shown.

723 † After a single SNP occurred or multiple SNPs simultaneously occurred, the classifier produced  
724 a new prediction on whether the TF is still capable of significantly affecting gene expression via  
725 the variant promoter.

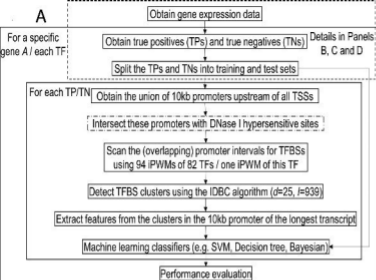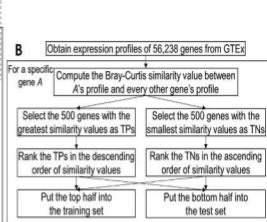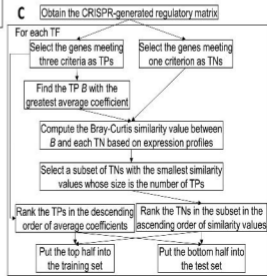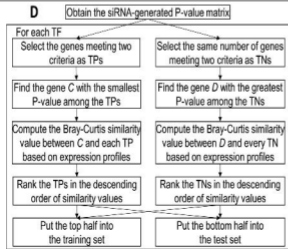

## NR3C1

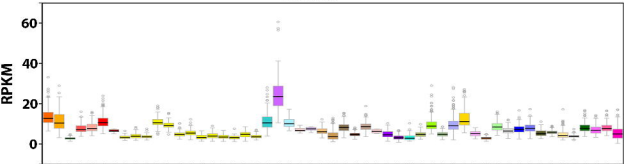

## SLC25A32

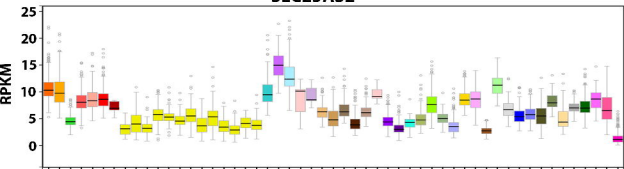

## TANK

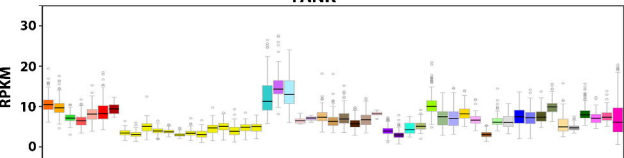

Adipose - Subcutaneous  
 Adipose - Visceral (Omentum)  
 Adrenal Gland  
 Artery - Aorta  
 Artery - Coronary  
 Artery - Tibial  
 Bladder  
 Brain - Amygdala  
 Brain - Anterior Cingulate Cortex (BA24)  
 Brain - Caudate (Basal Ganglia)  
 Brain - Cerebellar Hemisphere  
 Brain - Cerebellum  
 Brain - Cortex  
 Brain - Frontal Cortex (BA9)  
 Brain - Hippocampus  
 Brain - Hypothalamus  
 Brain - Nucleus Accumbens (Basal Ganglia)  
 Brain - Putamen (Basal Ganglia)  
 Brain - Spinal Cord (Cervical c-1)  
 Brain - Substantia Nigra  
 Breast - Mammary Tissue  
 Cells - EBV-transformed Lymphocytes  
 Cells - Transformed Fibroblasts  
 Cervix - Ectocervix  
 Cervix - Endocervix  
 Colon - Sigmoid  
 Colon - Transverse  
 Esophagus - Gastroesophageal Junction  
 Esophagus - Mucosa  
 Esophagus - Muscularis  
 Fallopian Tube  
 Heart - Atrial Appendage  
 Heart - Left Ventricle  
 Kidney - Cortex  
 Liver  
 Lung  
 Minor Salivary Gland  
 Muscle - Skeletal  
 Nerve - Tibial  
 Ovary  
 Pancreas  
 Pituitary  
 Prostate  
 Skin - Not Sun Exposed (Suprapubic)  
 Skin - Sun Exposed (Lower Leg)  
 Small Intestine - Terminal Ileum  
 Spleen  
 Stomach  
 Testis  
 Thyroid  
 Uterus  
 Vagina  
 Whole Blood

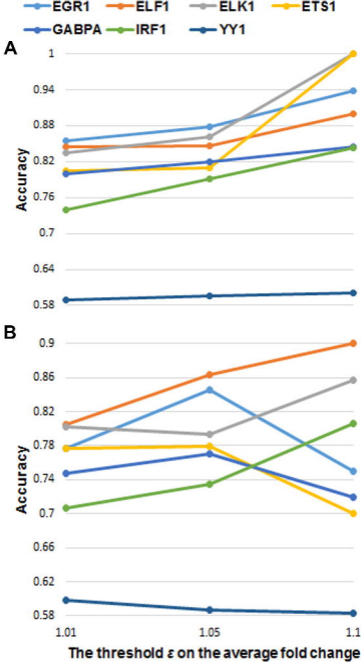

 : A binding site of EGR1

 : An EGR1 molecule

 /  : Is / is not a DE target of EGR1

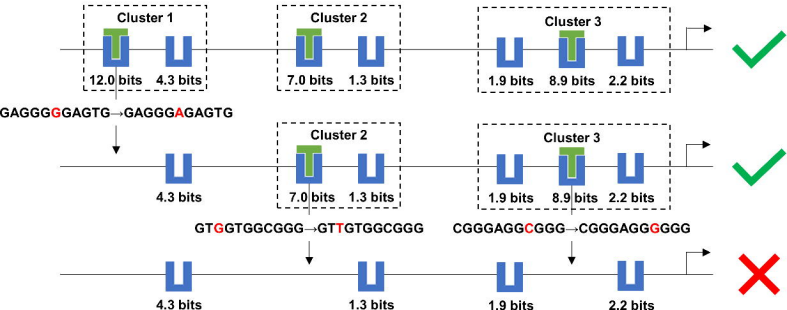

Source: http://biorxiv.org/content/10.1101/283267v1.full.pdf
